# Supplementary material for: Peanuts that keep aflatoxin at bay: a threshold that matters
Source: PubMed Central journal article supplement (PMC5902767; doi:10.1111/pbi.12846), 2017-10-17
Supplement: PBI-16-1024-s001.pdf [file PBI-16-1024-s001.pdf]

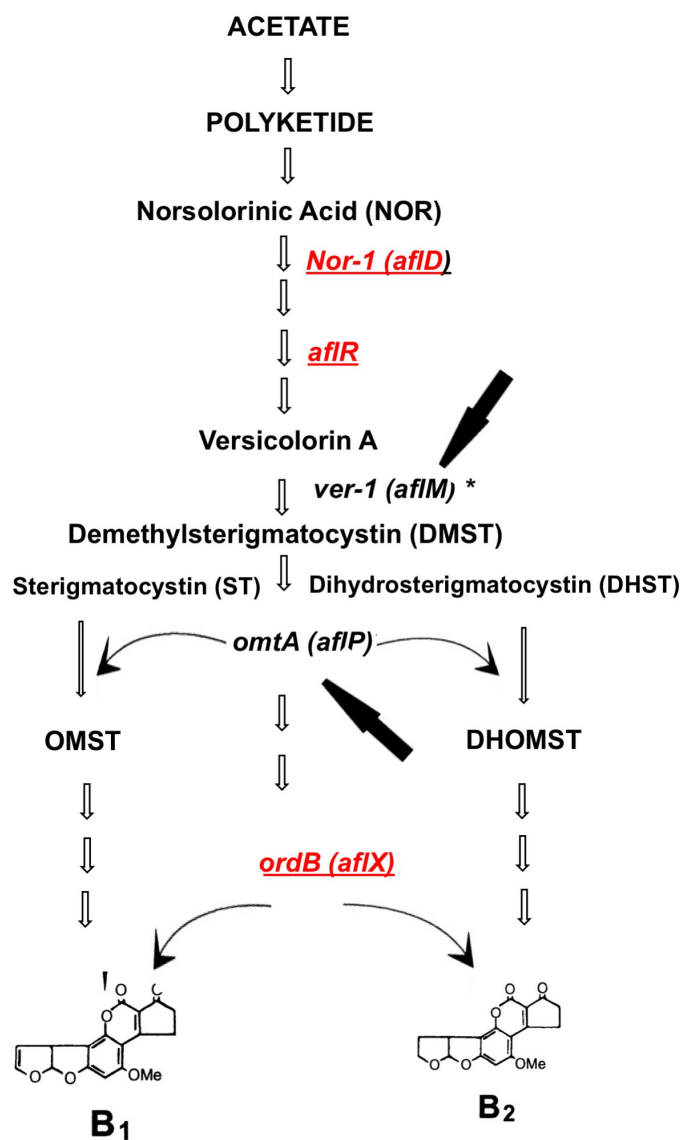

**Fig. S1.** The aflatoxin biosynthesis pathway for B<sub>1</sub> and B<sub>2</sub>, toxin depicting the enzymatic steps (bold and \*) targeted for host induced gene silencing (HIGS). The pathway genes studied for changes in transcript expression in *A. flavus* infecting the peanut cotyledons are given in red, italicized and underlined.

Figure S2

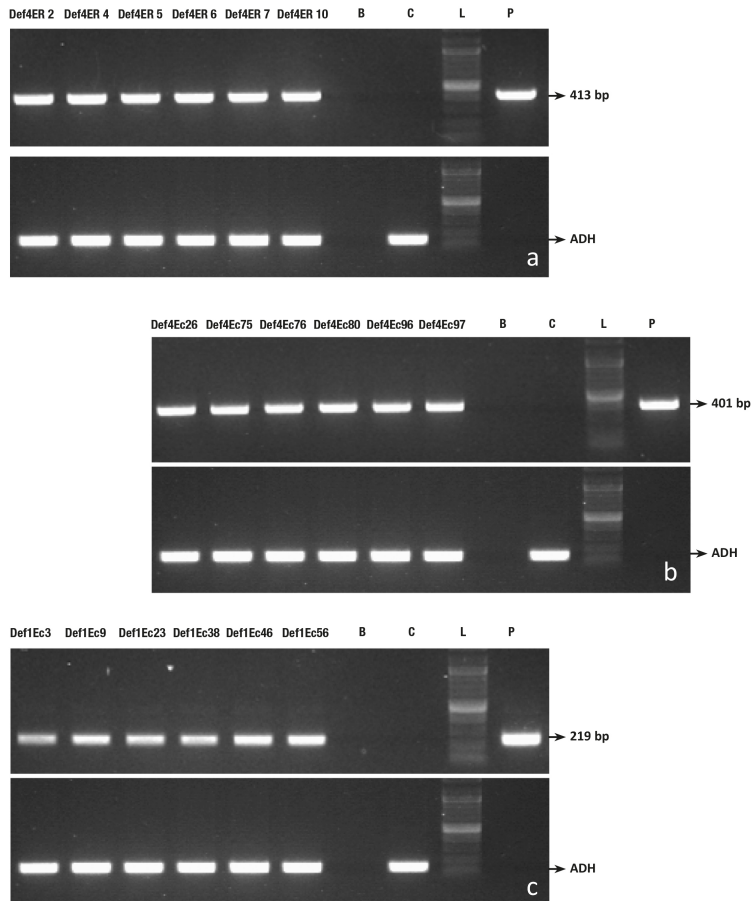

**Fig. S2.** RT-PCR analysis of total RNA from mature seeds of OE-Def events (A) cDNA from plants transformed with each of OE-Def constructs (OE-Def4-ER, OE-Def4-Ec, and OE-Def1-Ec) and WT control was used to amplify the inserted transgene with amplicon sizes of 413 bp, 401 bp and 219 bp, respectively (upper panel) and an endogenous gene (*ADH3*; lower panel). The presence of genomic DNA in the cDNA preparation would be detected with the *ADH3* primers, which produces a 450 bp band instead of 143 bp (not seen in any of the samples).

Figure S3 a-d

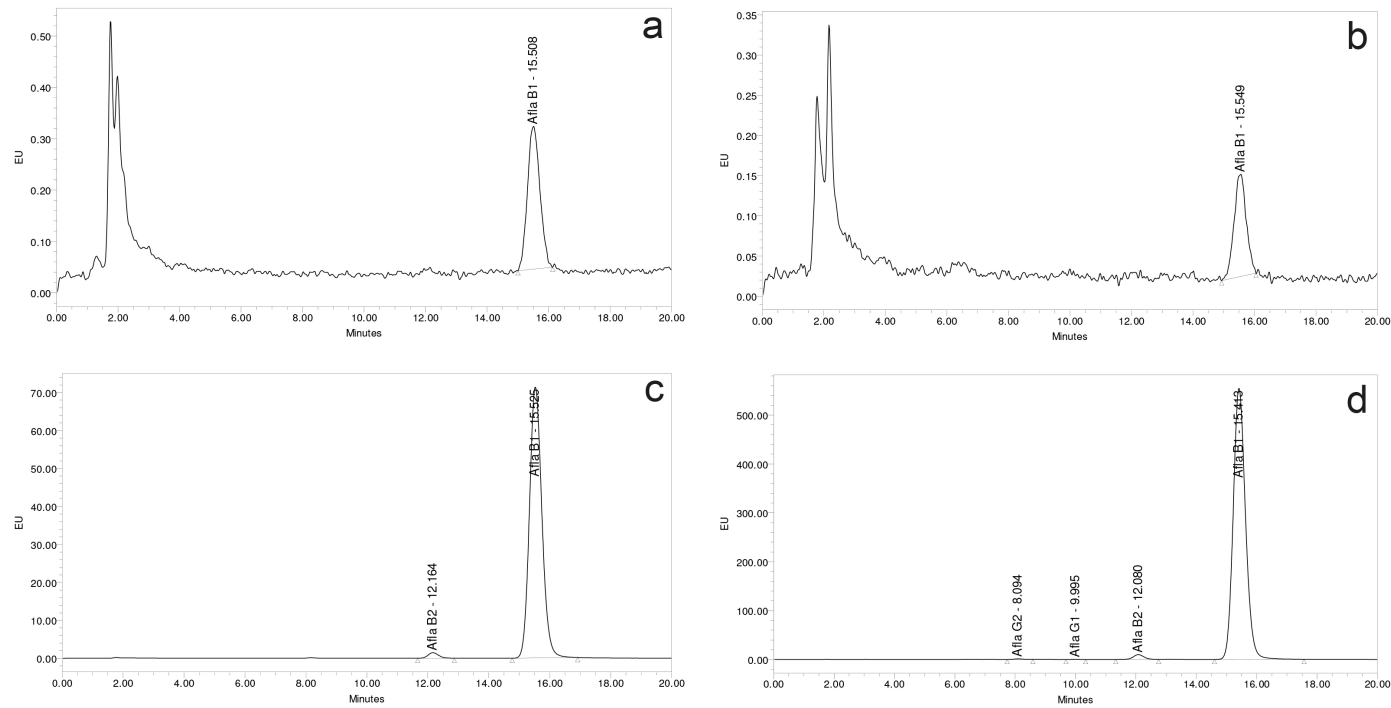

**Fig. S3.** Chromatograms of representative peanut events depicting peaks for aflatoxins (B<sub>1</sub>, B<sub>2</sub>, G<sub>1</sub> and G<sub>2</sub>) in OE-Def4-Ec 96 (a), and OE-Def4-Ec 97 (b), resistant check, 55-437 (c) and WT control (d).

Figure S4 a-c

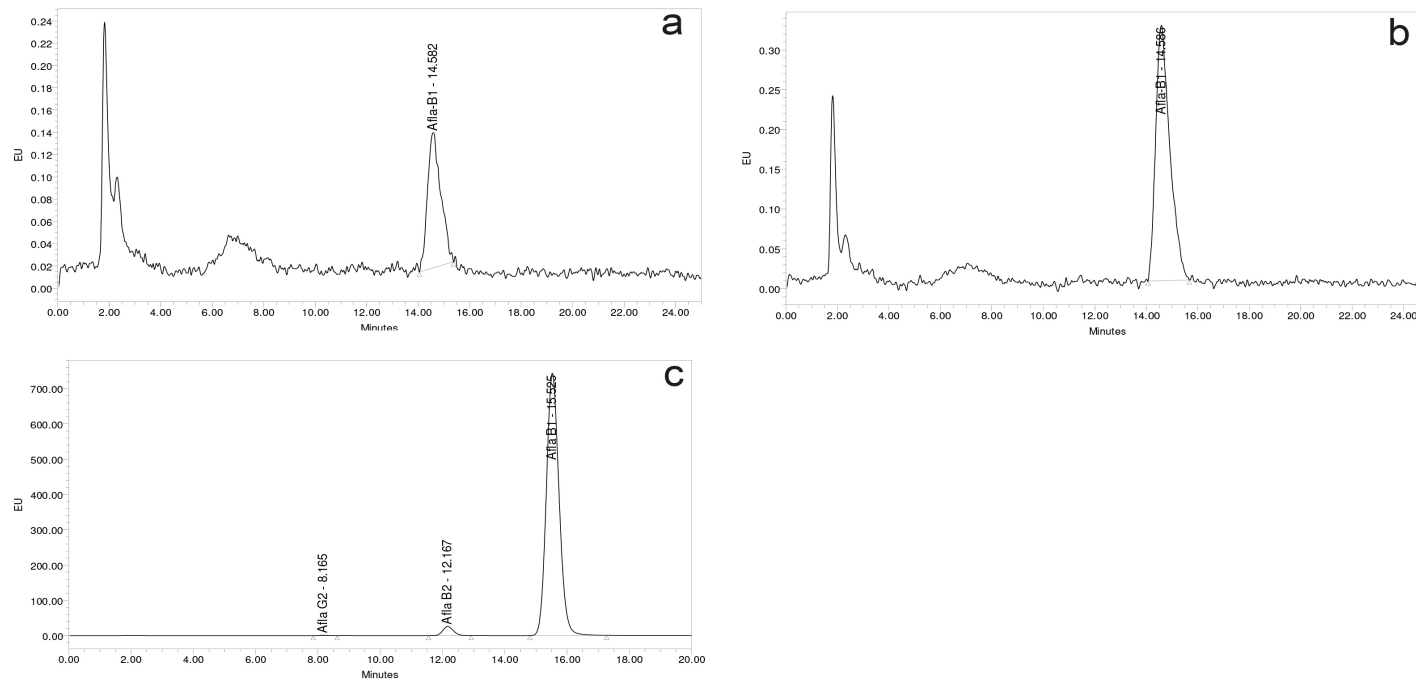

**Fig. S4.** Chromatograms of representative peanut OE-Def events, depicting peaks for aflatoxins (B<sub>1</sub>, B<sub>2</sub>, G<sub>1</sub> and G<sub>2</sub>) in OE-Def4-ER 6 (a), OE-Def1-Ec 23 (b) and WT control (c).

Figure S5 a-c

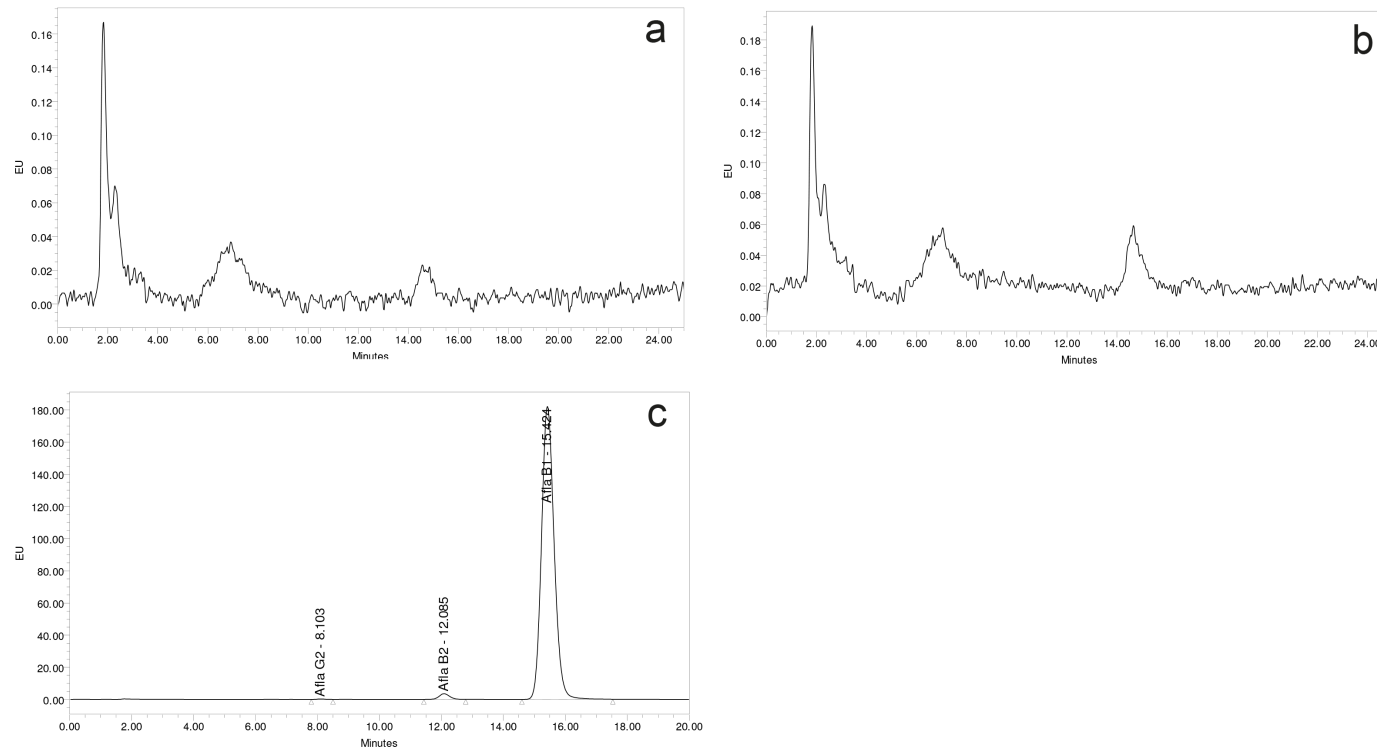

**Fig. S5.** Chromatograms of representative peanut HIGS lines, depicting peaks for aflatoxins (B<sub>1</sub>, B<sub>2</sub>, G<sub>1</sub> and G<sub>2</sub>) in hp-omtA 16 (a), hp-ver1-6 (b), and WT control (c).

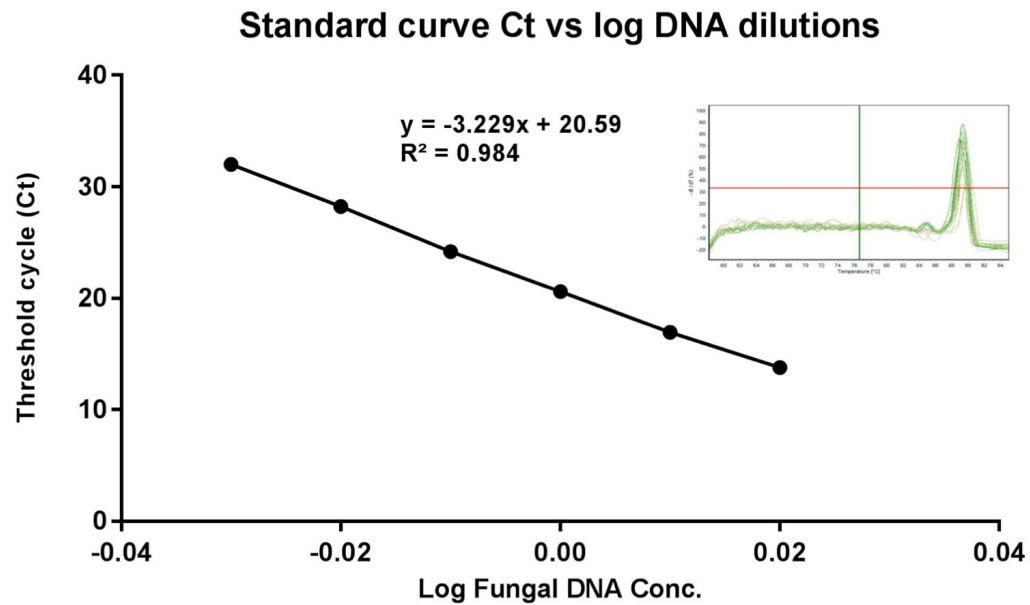

**Fig. S6.** Calibration of qPCR for quantification of *A. flavus* strain 11-4 in infected host **tissues**. (a) *Standard curve analysis*: Standard curve showing the correlation between the  $\log^{10}$  DNA amounts (ng) vs. the Ct values for 10-fold dilution of pure fungal genomic DNA. (b) *Melting curve analysis*: The melting curve (SYBR Green fluorescence versus temperature) of specific amplifications from ITS2 region at different concentrations. No contaminating product was detected in PCR reactions.

**Fig. S7. Progeny analyses of short listed low aflatoxin accumulating peanut OE-Def and HIGS lines.** The segregation of selected homozygous progeny is highlighted in bold. Events with single copy insert are shown with \*, with \*\* indicating 2 copies (based on qPCR data). The identified best bets based on stable genetics and aflatoxin trait have been advanced (highlighted and italicized).

| Primary Transformant | T1    | T2                      | T3                       | T4                   |
|----------------------|-------|-------------------------|--------------------------|----------------------|
| Def1Ec 3             | (8:1) | <b>3-3 →(5:0)</b>       |                          |                      |
|                      |       | <b>3-6 →(4:0)</b> →     | <i>3-6 (1-4)</i>         |                      |
|                      |       | <b>3-7 →(1:0)</b> →     | <i>3-7 (1)</i>           |                      |
|                      |       | <b>3-10 → (2:0)</b>     |                          |                      |
| Def1Ec 23            | (5:3) | 23-5* → (7:1)           | <b>23-5-2 →(10:0)</b> →  | <i>23-5-2 (1-10)</i> |
|                      |       |                         | <b>26-6-3 → (6:0)</b> →  | <i>26-6-3 (1-6)</i>  |
| Def4Ec 26            | (6:4) | 26-6 → (5:1)            | 26-6-4 →(3:2)            |                      |
|                      |       | <b>26-10 →( 2:0)</b> →  | <b>26-10 (1-2)</b>       |                      |
|                      |       |                         | 80-1-6 →(3:1)            |                      |
| Def4Ec 80            | (5:3) | 80-1 → (12:1)           | <b>80-1-8 →(4:0)</b> →   | <i>80-1-8 (1-4)</i>  |
|                      |       |                         | 80-1-10 →(2:2)           |                      |
|                      |       |                         | 96-1-1 →(3:3)            |                      |
| Def4Ec 96            | (5:0) | 96-1 → (15:5)           | 96-1-10 →(4:2)           |                      |
|                      |       | <b>96-2 →( 10:0)</b> →  | <b>96-2 (1-10)</b>       |                      |
|                      |       |                         | 97-1-3 → (5:1)           |                      |
| Def4Ec 97            | (5:2) | 97-1 →(10:2)            | 97-1-11 →(4:1)           |                      |
|                      |       | <b>97-2* → (7:0)</b> →  | <b>97-2 (1-7)</b>        |                      |
|                      |       |                         | 6-7-2 →(5:1)             |                      |
| Def4ER 6             | (8:2) | 6-7 → (9:1)             | 6-7-10 →(4:2)            |                      |
|                      |       | 6-10 → (8:4)            | <b>6-10-8 → (6:0)</b> →  | <i>6-10-8 (1-6)</i>  |
| Def4ER 7             | (8:0) | <b>7-5** →(11:0)</b> →  | <i>7-5 (1-11)</i>        |                      |
|                      |       | <b>7-6 → (17:0)</b> →   | <i>7-6 (1-17)</i>        |                      |
| OMT 1                | (5:0) | 1-1 → (10:3)            | 1-1-11* → (8:4)          |                      |
| OMT 14               | (2:0) | <b>14-1* → (11:0)</b> → | <i>14-1 (1-11)</i>       |                      |
|                      |       |                         | 16-1-2 →(5:1)            |                      |
| OMT 16               | (2:0) | 16-1 → (9:6)            | <b>16-1-15 → (2:0)</b> → | <i>16-1-15 (1-2)</i> |
|                      |       |                         | 2-3-1 → (4:2)            |                      |
| Ver1 2               | (6:2) | 2-3 → (9:6)             | 2-3-8 → (5:1)            |                      |
| Ver1 3               | (6:1) | 3-2 → (10:4)            | <b>3-3-5 →(8:0)</b> →    | <i>3-3-5 (1-8)</i>   |
|                      |       | 3-3 → (8:2)             | 3-3-7 (8:2)              |                      |
|                      |       |                         | <b>3-3-8 →(4:0)</b> →    | <i>3-3-8 (1-4)</i>   |
| Ver1 6               | (2:0) | 6-1 →(6:4)              | 6-2-4* → (10:1)          |                      |
|                      |       | 6-2 →(6:2)              | <b>6-2-9 → (11:0)</b> →  | <i>6-2-9 (1-11)</i>  |

Fig. S8. Proposed strategy for tackling the complexities of *A. flavus-peanut* pathosystem and aflatoxin accumulation.

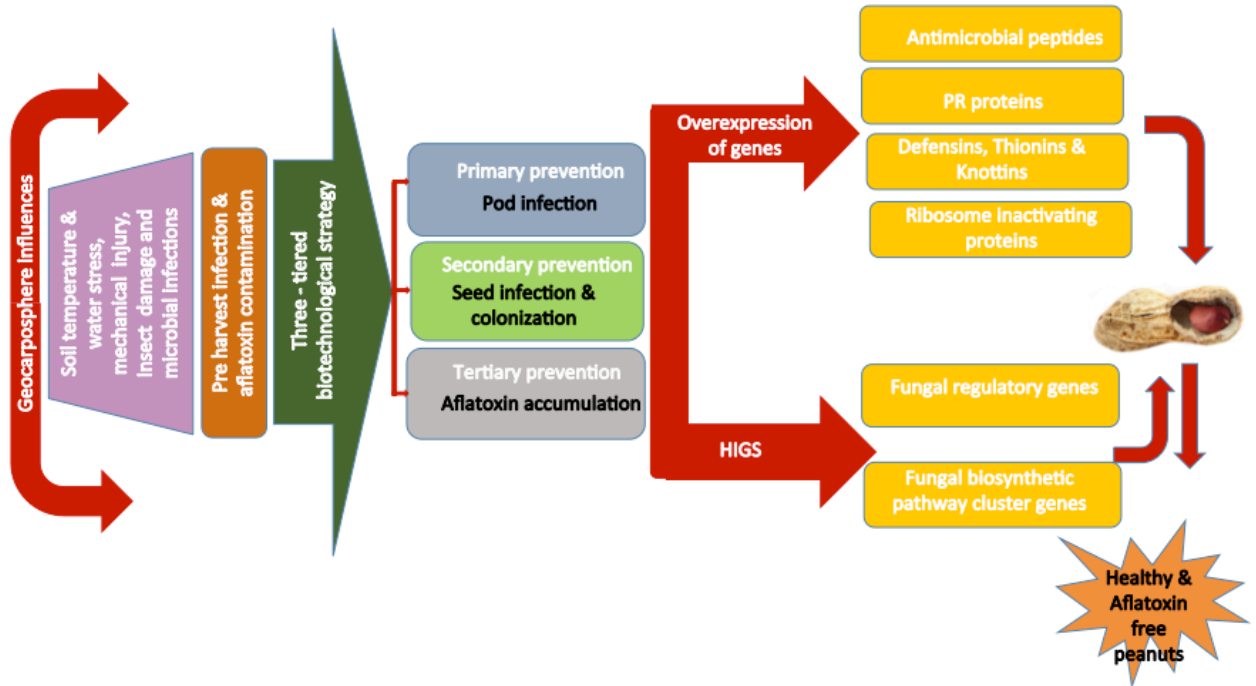



**Table S1. List of oligonucleotide primers used in this study.**

| S. No. | Primer code | Primer Sequence         | T <sub>m</sub> (°C) | Primer used for | Product Size |
|--------|-------------|-------------------------|---------------------|-----------------|--------------|
| 1      | AhAPXF      | TGCTGGAAC TTTTGATGTGG   | 60                  | qRT-PCR         | 167 bp       |
|        | AhAPXR      | AACTACACCGGCCAACTG      |                     |                 |              |
| 2      | AhCATF      | CTAGGGGAGCAAGTGCAAAG    | 60                  | qRT-PCR         | 194 bp       |
|        | AhCATR      | CTCCCGGGTG TAAA ACTTCA  |                     |                 |              |
| 3      | AhSODF      | CAGTTCTTAGCAGCAGTGAG    | 60                  | qRT-PCR         | 118 bp       |
|        | AhSODR      | GGAACCCATGAAGACCAG      |                     |                 |              |
| 4      | MsDef1Ec F  | GCACAAGAAATTGTGGTGACA   | 60                  | qRT-PCR         | 153 bp       |
|        | MsDef1Ec R  | AGTACACCAGCAGCGGAAGT    |                     |                 |              |
| 5      | MtDef4 F    | TTCCTTTGGTTTCCACCATC    | 60                  | qRT-PCR         | 244 bp       |
|        | MtDef4 R    | TGCTTCTGCCACCATACTTG    |                     |                 |              |
| 3      | aflR F      | GAAGACAGGGTGCTTTGCTC    | 60                  | qRT-PCR         | 225 bp       |
|        | aflR R      | CTCAACGCCTCATGCTCATA    |                     |                 |              |
| 4      | aflD F      | GTGGTGGTTGCCAATGCG      | 60                  | qRT-PCR         | 116 bp       |
|        | aflD R      | CTGAAACAGTAGGACGGGAGC   |                     |                 |              |
| 5      | aflJ F      | ATAAAGTCAGCGCGTGGTG     | 60                  | qRT-PCR         | 307 bp       |
|        | aflJ R      | ATGACCGGCACCTTAGCAGT    |                     |                 |              |
| 6      | aflKF       | GAGCGACAGGAGTAACCGTAAG  | 60                  | qRT-PCR         | 120 bp       |
|        | aflKR       | CCGATTCCAGACACCATTAGCA  |                     |                 |              |
| 7      | aflM F      | AGCCAAAGTCGTGGTGA ACT   | 60                  | qRT-PCR         | 215 bp       |
|        | aflM R      | CTTTCAGGTGACCGAACGAT    |                     |                 |              |
| 8      | aflO F      | GATTGGGATGTGGTCATGCGATT | 60                  | qRT-PCR         | 181 bp       |
|        | aflO R      | GCCTGGGTCCGAAGAATGC     |                     |                 |              |
| 9      | aflP F      | CACTCGACACAATCGTCACC    | 60                  | qRT-PCR         | 109 bp       |
|        | aflP R      | TATTGATCAGGGGCAACCTC    |                     |                 |              |
| 10     | aflX F      | AGGTTTGACGAAGGTTGTGG    | 60                  | qRT-PCR         | 216 bp       |

|    |                    |                          |    |                                  |        |
|----|--------------------|--------------------------|----|----------------------------------|--------|
|    | afIX R             | GCACTGAAAAAGCTCCAAGC     |    |                                  |        |
| 11 | $\beta$ -tubulin F | GCCGCTTTTTGACTTGCTCC     | 60 | qRT-PCR                          | 231 bp |
|    | $\beta$ -tubulin R | ACTGATTGCCGATACGCTGG     |    |                                  |        |
| 12 | MsDef1Ec F         | ATGGAGAAGAAATCACTAGCTGGC | 56 | PCR & RT-PCR                     | 219 bp |
|    | MsDef1Ec R         | TTAACATCTTTTAGTACACCAGCA |    |                                  |        |
| 13 | MtDef4ER F         | ATGGCTCGTTCAGTTCCTTTGG   | 56 | PCR & RT-PCR                     | 413 bp |
|    | MtDef4ER R         | TTACAGCTCGTCCTTACAATGTG  |    |                                  |        |
| 14 | MtDef4Ec F         | ATGGCTCGTTCAGTTCCTTTGG   | 56 | PCR & RT-PCR                     | 401 bp |
|    | MtDef4Ec R         | TTAACAATGTGTAGTGCAAAAGC  |    |                                  |        |
| 15 | FMV F              | ATTGGGTTCAATCAACAAGG     | 56 | PCR & RT-PCR                     | 542 bp |
|    | FMV R              | CTTCAAATGGGAATGAATGC     |    |                                  |        |
| 16 | PR10 F             | TGAAACTCACCCAGGGATTG     | 56 | PCR & RT-PCR                     | 523 bp |
|    | PR10 R             | TCAGGCGAAAGAGAGAGAGA     |    |                                  |        |
| 17 | OMT F              | ACGAAGCCACTGGTAGAGG      | 56 | PCR, RT-PCR & qPCR- copy number  | 310 bp |
|    | OMT R              | CGGTGACGATGTTAGAG        |    |                                  |        |
| 18 | Ver1 F             | CGGATTATCCTGACCAGCTC     | 56 | PCR & RT-PCR & qPCR- copy number | 330 bp |
|    | Ver1 R             | ACCTGCTCATCGGTGAAAGT     |    |                                  |        |
| 19 | FLAV-F             | GTCGTCCCCTCTCCGG         | 60 | qRT-PCR-fungal load              | 100 bp |
|    | FLAV-R             | CTGGAAAAAGATTGATTTGCG    |    |                                  |        |
| 20 | FMV CN F           | TGCATGTGCTGGAACAGTAGT    | 60 | qPCR- copy number                | 111 bp |
|    | FMV CN R           | TCCAAAGCCTCAACAAGGTCA    |    |                                  |        |
| 21 | GnVP F             | ACACCTACAGTTGTCCCAGCTT   | 60 | qPCR- copy number                | 147 bp |
|    | GnVP R             | CTAGGAACCGCTTGAACCCTGT   |    |                                  |        |
| 22 | ADH3 F             | GCTTCAAGAGCAGGTCACAAGT   | 60 | RT-PCR & qPCR- copy number       | 450 bp |
|    | ADH3 R             | GAGACATCCTCCTTCGTGCATA   |    |                                  |        |

**Table S2.** Individual toxin quantification in peanut cotyledons based on ELISA & HPLC following *Aspergillus flavus* (AF 11-4) infection. At least 3-6 biological replicates per event/line were used along with WT control (JL 24), nulls and resistant check (55-437). The individual toxin readings are shown as parts per billion (ppb) +/- SE. Mean data are the average of replicated readings. \*\*Significant at P < 0.01, ns indicates non significance, nd indicates non-detectable (LOD = 0.1 ppb), # indicates tested only by ELISA.

| Event                  | AfB <sub>1</sub> (ppb)       | AfB <sub>2</sub> (ppb) | AfG <sub>1</sub> (ppb)  | AfG <sub>2</sub> (ppb)  |
|------------------------|------------------------------|------------------------|-------------------------|-------------------------|
| Def4ER 2               | 7.23±4.34**                  | 0.37±0.01**            | nd                      | nd                      |
| Def4ER 5               | 0.99±0.25**                  | 0.40±0.07**            | nd                      | nd                      |
| Def4ER 6               | 4.48±4.08**                  | 0.36±0.03**            | nd                      | nd                      |
| Def4ER 7               | 1.69±0.92**                  | 0.73±0.16**            | nd                      | nd                      |
| Def4Ec 26              | 0.55±0.03**                  | 0.52±0.06**            | nd                      | nd                      |
| Def4Ec 75              | 0.77±0.24**                  | 0.31±0.04**            | nd                      | nd                      |
| Def4Ec 76              | 0.26±0.02**                  | 0.40±0.03**            | nd                      | nd                      |
| Def4Ec 80 <sup>#</sup> | 9.135±8.53**                 | -                      | -                       | -                       |
| Def4Ec 96              | 0.91±0.23**                  | 0.65±0.08**            | nd                      | nd                      |
| Def4Ec 97              | 1.12±0.44**                  | 0.80±0.19**            | nd                      | nd                      |
| Def1Ec 9               | 3.00±1.30**                  | 0.67±0.11**            | nd                      | nd                      |
| Def1Ec 23              | 0.74±0.07**                  | 0.74±0.07**            | nd                      | nd                      |
| Def1Ec 38 <sup>#</sup> | 3.93±2.49**                  | -                      | -                       | -                       |
| Def1Ec 46 <sup>#</sup> | 5.26±2.11**                  | -                      | -                       | -                       |
| Def1Ec 56              | 2.13±1.75**                  | 0.44±0.06**            | nd                      | nd                      |
| OMT 33                 | 6.18±0.62**                  | 0.78±0.16**            | nd                      | nd                      |
| OMT 1                  | 0.83±0.11**                  | 0.83±0.11**            | nd                      | nd                      |
| OMT 3 <sup>#</sup>     | 11±4.11**                    | -                      | -                       | -                       |
| OMT 14                 | 14.04±10.93**                | 1.43±0.25**            | nd                      | nd                      |
| OMT 16                 | 21.16±4.03**                 | 0.97±0.21**            | nd                      | nd                      |
| OMT 17                 | 5.70±2.96**                  | 0.85±0.10**            | nd                      | nd                      |
| Ver1 1 <sup>#</sup>    | 12±3.96**                    | -                      | -                       | -                       |
| Ver1 41                | 2.55±0.55**                  | 1.37±0.62**            | nd                      | nd                      |
| Ver1 42                | 2.75±1.79**                  | 0.68±0.27**            | nd                      | nd                      |
| Ver1 6                 | 3.91±1.85**                  | 0.65±0.10**            | nd                      | nd                      |
| Null1                  | 3039.15±468.53 <sup>ns</sup> | 132.76±16.73*          | 1.10±0.27 <sup>ns</sup> | 2.26±0.14 <sup>ns</sup> |
| 55-437 (RC)            | 594.20±47.49 <sup>ns</sup>   | 15.47±1.19*            | 0.44±0.07 <sup>ns</sup> | 0.44±0.07 <sup>ns</sup> |
| JL 24 (WT)             | 2085.50±372.29               | 76.67±13.41            | 0.69±0.21               | 1.52±0.43               |
|                        |                              |                        |                         |                         |

**Table S3.** Linear regression analysis between accumulated aflatoxin versus fungal colonization, gene expression of host antioxidative machinery and *A. flavus* aflatoxin cluster genes in OE-Def and HIGS peanut lines.

| Variable 1                            | Lines         | Variable 2                            | Correlation coefficient ( $r^2$ ) | R value   | No. of pairs |
|---------------------------------------|---------------|---------------------------------------|-----------------------------------|-----------|--------------|
| <b>B<sub>1</sub> (ppb)</b>            | <b>OE-Def</b> | Fungal load                           | 0.624                             | 0.790***  | 32           |
|                                       |               | Peanut APX gene expression at 72hpi   | 0.128                             | -0.358*   | 34           |
|                                       |               | Peanut CAT gene expression at 72 hpi  | 0.036                             | -0.190    | 34           |
|                                       |               | Peanut SOD gene expression at 72 hpi  | 0.048                             | -0.219    | 34           |
|                                       |               | <i>aflX</i> gene expression at 72 hpi | 0.964                             | 0.982***  | 12           |
|                                       |               | <i>aflP</i> gene expression at 72 hpi | 0.265                             | 0.514     | 12           |
|                                       |               | <i>aflR</i> gene expression at 72 hpi | 0.966                             | 0.983***  | 12           |
|                                       |               | <i>aflD</i> gene expression at 72 hpi | 0.967                             | 0.984***  | 12           |
|                                       |               | <i>aflM</i> gene expression at 72 hpi | 0.539                             | 0.73443** | 12           |
|                                       |               |                                       |                                   |           |              |
|                                       | <b>HIGS</b>   | Fungal load                           | 0.175                             | 0.418     | 19           |
|                                       |               | Peanut APX gene expression at 72 hpi  | 0.053                             | -0.230    | 14           |
|                                       |               | Peanut CAT gene expression at 72 hpi  | 0.170                             | -0.412    | 14           |
|                                       |               | Peanut SOD gene expression at 72 hpi  | 0.224                             | -0.473    | 14           |
|                                       |               | <i>aflX</i> gene expression at 72 hpi | 0.472                             | 0.687***  | 38           |
|                                       |               | <i>aflP</i> gene expression at 72 hpi | 0.404                             | 0.636***  | 38           |
|                                       |               | <i>aflM</i> gene expression at 72 hpi | 0.127                             | 0.356*    | 38           |
|                                       |               | <i>aflD</i> gene expression at 72 hpi | 0.293                             | 0.541**   | 38           |
| <i>aflR</i> gene expression at 72 hpi |               | 0.331                                 | 0.575**                           | 38        |              |

\*, \*\* and \*\*\* reflect statistically significant correlation at  $p \leq 0.05$ ,  $\leq 0.01$  and  $\leq 0.001$  respectively.

**Table S4.** Inheritance studies in segregating peanut OE-Def events during T<sub>1</sub>, T<sub>2</sub> and T<sub>3</sub> generations.

| Generation     | Event#         | No. of plants tested | PCR and RT-PCR positives | PCR and RT-PCR negatives | X <sup>2</sup> value |
|----------------|----------------|----------------------|--------------------------|--------------------------|----------------------|
| <i>Def4Ec</i>  |                |                      |                          |                          |                      |
| T <sub>1</sub> | Def4Ec 26      | 10                   | 6                        | 4                        | 1.20                 |
|                | Def4Ec 75      | 6                    | 5                        | 1                        | 0.21                 |
|                | Def4Ec 76      | 6                    | 5                        | 1                        | 0.21                 |
|                | Def4Ec 80      | 8                    | 5                        | 3                        | 1.20                 |
|                | Def4Ec 96      | 5                    | 5                        | 0                        | 1.65                 |
|                | Def4Ec 97      | 7                    | 5                        | 2                        | 0.18                 |
| T <sub>2</sub> | Def4Ec 26-6    | 6                    | 5                        | 1                        | 0.21                 |
|                | Def4Ec 75-3    | 10                   | 8                        | 2                        | 0.13                 |
|                | Def4Ec 80-1    | 13                   | 12                       | 1                        | 2.07                 |
|                | Def4Ec 96-1    | 20                   | 15                       | 5                        | 0.00                 |
|                | Def4Ec 96-2    | 10                   | 8                        | 2                        | 0.2                  |
|                | Def4Ec 96-3    | 10                   | 5                        | 5                        | 3.33                 |
|                | Def4Ec 97-1    | 12                   | 10                       | 2                        | 0.33                 |
|                | Def4Ec 97-2    | 6                    | 4                        | 2                        | 0.21                 |
| T <sub>3</sub> | Def4Ec 26-6-3  | 6                    | 4                        | 2                        | 0.21                 |
|                | Def4Ec 26-6-4  | 5                    | 3                        | 2                        | 0.60                 |
|                | Def4Ec 75-3-1  | 4                    | 3                        | 1                        | 2.00                 |
|                | Def4Ec 80-1-6  | 4                    | 3                        | 1                        | 2.00                 |
|                | Def4Ec 80-1-8  | 4                    | 4                        | 0                        | 1.30                 |
|                | Def4Ec 80-1-10 | 4                    | 2                        | 2                        | 1.30                 |
|                | Def4Ec 96-1-1  | 6                    | 3                        | 3                        | 2.00                 |
|                | Def4Ec 96-1-3  | 6                    | 3                        | 3                        | 2.00                 |
|                | Def4Ec 96-1-5  | 6                    | 3                        | 3                        | 2.00                 |
|                | Def4Ec 96-1-10 | 6                    | 4                        | 2                        | 0.21                 |
|                | Def4Ec 97-1-3  | 6                    | 5                        | 1                        | 0.21                 |
|                | Def4Ec 97-1-11 | 5                    | 4                        | 1                        | 0.06                 |
| <i>Def1Ec</i>  |                |                      |                          |                          |                      |
|                | Def1Ec 3       | 9                    | 8                        | 1                        | 0.93                 |
| T <sub>1</sub> | Def1Ec 9       | 4                    | 2                        | 2                        | 1.30                 |
|                | Def1Ec 23      | 8                    | 5                        | 3                        | 1.20                 |
|                | Def1Ec 38      | 3                    | 2                        | 1                        | 0.11                 |
|                | Def1Ec 46      | 8                    | 5                        | 3                        | 1.20                 |
|                | Def1Ec 56      | 8                    | 4                        | 4                        | 2.00                 |
| T <sub>2</sub> | Def1Ec 3-3     | 5                    | 5                        | 0                        | 1.67                 |

|                |                |    |    |   |      |
|----------------|----------------|----|----|---|------|
|                | Def1Ec 3-6     | 4  | 4  | 0 | 1.33 |
|                | Def1Ec 3-7     | 1  | 1  | 0 | 1    |
|                | Def1Ec 3-10    | 2  | 2  | 0 | 0.67 |
|                | Def1Ec 9-3     | 6  | 4  | 2 | 0.21 |
|                | Def1Ec 23-5    | 8  | 7  | 1 | 0.62 |
|                | Def1Ec 38-1    | 10 | 5  | 5 | 3.33 |
|                | Def1Ec 46-9    | 7  | 7  | 0 | 2.33 |
|                | Def1Ec 56-8    | 10 | 9  | 1 | 1.2  |
| T <sub>3</sub> | Def1Ec 9-3-4   | 6  | 5  | 1 | 0.21 |
|                | Def1Ec 9-3-6   | 6  | 6  | 0 | 1.30 |
|                | Def1Ec 23-5-2  | 12 | 10 | 2 | 0.33 |
|                | Def1Ec 46-9-7  | 6  | 4  | 2 | 0.21 |
|                | Def1Ec 56-8-7  | 4  | 4  | 0 | 1.30 |
|                | Def1Ec 56-8-10 | 6  | 4  | 2 | 0.21 |
| <b>Def4ER</b>  |                |    |    |   |      |
| T <sub>1</sub> | Def4ER 2       | 10 | 6  | 4 | 1.20 |
|                | Def4ER 5       | 3  | 2  | 1 | 0.1  |
|                | Def4ER 6       | 10 | 8  | 2 | 0.13 |
| T <sub>2</sub> | Def4ER 2-1     | 17 | 14 | 3 | 0.49 |
|                | Def4ER 2-8     | 15 | 14 | 1 | 2.69 |
|                | Def4ER 5-1     | 21 | 12 | 9 | 3.57 |
|                | Def4ER 6-7     | 10 | 9  | 1 | 1.20 |
|                | Def4ER 6-10    | 12 | 8  | 4 | 0.44 |
|                | Def4ER 7-3     | 10 | 6  | 4 | 1.2  |
|                | Def4ER 7-4     | 10 | 7  | 3 | 0.13 |
|                | Def4ER 7-5     | 13 | 7  | 6 | 3.1  |
|                | Def4ER 7-6     | 17 | 10 | 7 | 2.37 |
| T <sub>3</sub> | Def4ER 2-1-2   | 7  | 5  | 2 | 0.18 |
|                | Def4ER 2-1-5   | 7  | 5  | 2 | 0.18 |
|                | Def4ER 2-8-6   | 6  | 4  | 2 | 0.21 |
|                | Def4ER 2-8-13  | 7  | 5  | 2 | 0.18 |
|                | Def4ER 5-1-21  | 6  | 4  | 2 | 0.21 |
|                | Def4ER 6-7-2   | 6  | 5  | 1 | 0.21 |
|                | Def4ER 6-7-10  | 6  | 4  | 2 | 0.21 |
|                | Def4ER 6-10-8  | 6  | 5  | 1 | 0.21 |

\*  $\chi^2$  value at 0.05% probability at 1 df is 3.84. Calculated values below 3.84 were non-significant, and the samples fit for 3: 1 segregation ratio.

**Table S5.** Inheritance studies in segregating peanut HIGS lines during T<sub>1</sub>, T<sub>2</sub> and T<sub>3</sub> generations.

| Generation     | Event#      | No. of plants tested | PCR and RT-PCR positives | PCR and RT-PCR negatives | $\chi^2$ value |
|----------------|-------------|----------------------|--------------------------|--------------------------|----------------|
| <b>OMT</b>     |             |                      |                          |                          |                |
| T <sub>1</sub> | OMT 1       | 5                    | 5                        | 0                        | 1.67           |
|                | OMT 2       | 4                    | 2                        | 2                        | 1.33           |
|                | OMT 3       | 6                    | 4                        | 2                        | 0.22           |
|                | OMT 7       | 2                    | 2                        | 0                        | 0.67           |
|                | OMT 14      | 1                    | 1                        | 0                        | 0.33           |
|                | OMT 16      | 2                    | 2                        | 0                        | 0.67           |
|                | OMT 17      | 4                    | 3                        | 1                        | 0.00           |
|                | OMT 33      | 4                    | 2                        | 2                        | 1.33           |
| T <sub>2</sub> | OMT 1-1     | 13                   | 10                       | 3                        | 0.03           |
|                | OMT 14-1    | 11                   | 10                       | 1                        | 1.48           |
|                | OMT 15-2    | 5                    | 3                        | 2                        | 0.60           |
|                | OMT 16-1    | 15                   | 9                        | 6                        | 1.80           |
| T <sub>3</sub> | OMT 1-1-11  | 12                   | 8                        | 4                        | 0.44           |
|                | OMT 16-1-2  | 6                    | 5                        | 1                        | 0.21           |
|                | OMT 16-1-6  | 6                    | 4                        | 2                        | 0.21           |
|                | OMT 16-1-15 | 2                    | 2                        | 0                        | 0.67           |
| <b>Ver 1</b>   |             |                      |                          |                          |                |
| T <sub>1</sub> | Ver1 1      | 2                    | 2                        | 0                        | 0.67           |
|                | Ver1 2      | 8                    | 6                        | 2                        | 0.00           |
|                | Ver1 3      | 7                    | 6                        | 1                        | 0.43           |
|                | Ver1 6      | 2                    | 2                        | 0                        | 0.67           |
|                | Ver1 41     | 4                    | 3                        | 1                        | 0.00           |
|                | Ver1 42     | 4                    | 2                        | 2                        | 1.33           |
| T <sub>2</sub> | Ver1 2-3    | 15                   | 9                        | 6                        | 1.80           |
|                | Ver1 3-2    | 14                   | 10                       | 4                        | 0.09           |
|                | Ver1 3-3    | 10                   | 8                        | 2                        | 0.13           |
|                | Ver1 6-1    | 10                   | 6                        | 4                        | 1.20           |
|                | Ver1 6-2    | 8                    | 6                        | 2                        | 0.00           |
| T <sub>3</sub> | Ver1 2-3-1  | 6                    | 4                        | 2                        | 0.21           |
|                | Ver1 2-3-8  | 6                    | 5                        | 1                        | 0.21           |
|                | Ver1 3-3-5  | 8                    | 6                        | 2                        | 0.00           |
|                | Ver1 3-3-7  | 10                   | 8                        | 2                        | 0.13           |
|                | Ver1 3-3-8  | 4                    | 4                        | 0                        | 1.30           |
|                | Ver1 6-2-4  | 14                   | 12                       | 2                        | 0.85           |
|                | Ver1 6-2-9  | 4                    | 3                        | 1                        | 2.00           |

\*  $\chi^2$  value at 0.05% probability at 1 df is 3.84. Calculated values below 3.84 were non-significant, and the samples fit for 3: 1 segregation ratio

**Table S6.** Overall list of selected lines used in the study and analyses applied to each throughout.

| Primary transformant # | Aflatoxin detection (by ELISA and HPLC) | Gene expression studies |                         |              | Copy number and inheritance | Events advanced |
|------------------------|-----------------------------------------|-------------------------|-------------------------|--------------|-----------------------------|-----------------|
|                        |                                         | Defensin genes          | Aflatoxin pathway genes | Antioxidants |                             |                 |
| Def1Ec 3               | ✓                                       |                         |                         |              | ✓                           | ✓               |
| Def1Ec 9               | ✓                                       |                         |                         |              |                             | ✓               |
| Def1Ec 23              | ✓                                       | ✓                       |                         | ✓            | ✓                           | ✓               |
| Def1Ec 38              | ✓                                       | ✓                       |                         | ✓            |                             | ✓               |
| Def1Ec 46              | ✓                                       |                         |                         |              |                             | ✓               |
| Def1Ec 56              | ✓                                       |                         |                         |              |                             | ✓               |
| Def4Ec 26              | ✓                                       | ✓                       | ✓                       | ✓            | ✓                           | ✓               |
| Def4Ec 75              | ✓                                       |                         |                         |              |                             | ✓               |
| Def4Ec 76              | ✓                                       |                         |                         |              |                             | ✓               |
| Def4Ec 80              | ✓                                       |                         |                         |              | ✓                           | ✓               |
| Def4Ec 96              | ✓                                       | ✓                       | ✓                       | ✓            | ✓                           | ✓               |
| Def4Ec 97              | ✓                                       | ✓                       | ✓                       | ✓            | ✓                           | ✓               |
| Def4ER 2               | ✓                                       |                         |                         |              |                             | ✓               |
| Def4ER 5               | ✓                                       |                         |                         |              |                             | ✓               |
| Def4ER 6               | ✓                                       | ✓                       | ✓                       | ✓            | ✓                           | ✓               |
| Def4ER 7               | ✓                                       | ✓                       | ✓                       | ✓            | ✓                           | ✓               |
| OMT 1                  | ✓                                       | NA                      |                         |              | ✓                           | ✓               |
| OMT 2                  | ✓                                       | NA                      |                         |              |                             | ✓               |
| OMT 3                  | ✓                                       | NA                      |                         |              |                             | ✓               |
| OMT 14                 | ✓                                       | NA                      | ✓                       | ✓            | ✓                           | ✓               |
| OMT 16                 | ✓                                       | NA                      | ✓                       | ✓            | ✓                           | ✓               |
| OMT 17                 | ✓                                       | NA                      |                         |              |                             | ✓               |
| OMT 33                 | ✓                                       | NA                      |                         |              |                             | ✓               |
| Ver1 1                 | ✓                                       | NA                      |                         |              |                             |                 |
| Ver1 2                 | ✓                                       | NA                      |                         |              | ✓                           | ✓               |
| Ver1 3                 | ✓                                       | NA                      |                         |              | ✓                           | ✓               |
| Ver1 6                 | ✓                                       | NA                      | ✓                       | ✓            | ✓                           | ✓               |
| Ver1 41                | ✓                                       | NA                      |                         |              |                             | ✓               |
| Ver1 42                | ✓                                       | NA                      |                         |              |                             | ✓               |

Note: NA: Not Applicable
